# Supplementary material for: MMP1 and MMP7 as Potential Peripheral Blood Biomarkers in Idiopathic Pulmonary Fibrosis
Source: PLOS journal article supplement (doi:10.1371/journal.pmed.0050093), 2008-04-25
Supplement: S2 (10.1371/journal.pmed.0050093.s002) [file journal.pmed.0050093.s002]

**MMP1 y MMP7 como Biomarcadores Potenciales de Sangre Periférica en Fibrosis Pulmonar Idiopática.**

**Resumen**

**Antecedentes:** La fibrosis pulmonar idiopática (FPI) es una enfermedad pulmonar crónica y progresiva asociada con significativa morbilidad y mortalidad. El objetivo de este estudio es determinar si en FPI existe una firma de proteínas en sangre periférica y si miembros de esta firma pueden servir como biomarcadores de la presencia y progresión de la enfermedad.

**Metodología/Hallazgos Principales:** Se analizaron las concentraciones de 49 proteínas en el plasma de 74 pacientes con FPI y 56 controles. Identificamos una firma combinatoria de 5 proteínas: MMP7, MMP1, MMP8, IGFBP1 y TNFRSF1A, que fue suficiente para distinguir pacientes de controles con una sensibilidad de 98.6% (95% i.c. de 92.7% a 100%) y una especificidad de 98.1% (95% i.c. de 89.9% a 100%). Un incremento de MMP1 y MMP7 se observó también en el tejido pulmonar y el fluido del lavado bronquioalveolar de pacientes con FPI. Las concentraciones plasmáticas de MMP7 y MMP1 no se encontraron aumentadas ni en enfermedad pulmonar obstructiva crónica ni en sarcoidosis y fueron capaces de distinguir FPI de neumonitis por hipersensibilidad subaguda/crónica, una enfermedad que puede mimetizar FPI, con una sensibilidad de 96.3 % (95% i.c. de 81.0% a 100%) y especificidad de 87.2% (95% i.c. de 72.6% a 95.7%).

Nuestros resultados se verificaron en una cohorte de validación independiente de pacientes con FPI, fibrosis pulmonar familiar, enfermedad pulmonar intersticial (EPI) sub-clínica y sujetos control. En esta cohorte, las concentraciones de MMP7 y MMP1 estuvieron significativamente elevadas en pacientes con FPI en comparación a los controles. Más aún, las concentraciones de MMP7 se encontraron elevadas en los pacientes con EPI subclínica y correlacionaron negativamente con la CVF% predicha y DLCO% predicha.

**Conclusiones:** Nuestros experimentos proveen la primera evidencia de una firma de proteínas de sangre periférica en FPI. Los dos principales componentes de esta firma, MMP7 y MMP1, se encuentran sobre-expresados en el microambiente pulmonar y distinguen a la FPI de otras enfermedades pulmonares crónicas. Adicionalmente, concentraciones incrementadas de MMP7 pueden ser indicativas de EPI asintomática y reflejar progresión de la enfermedad.
